# Supplementary material for: Adoption of a biologically-enhanced agricultural management (BEAM) approach in agroecosystems for regenerating soil fertility, improving farm profitability and achieving productive utilization of atmospheric CO2
Source: PeerJ journal article supplement (doi:10.7717/peerj.19167), 2025-03-31

Figure S-1: Research was conducted on this 5.22-hectare field plot (Lat. 37.779322°, Lon. 27.494952°), 8.5 kilometers from Soke, Turkey. Treatment borders are outlined in red and sample points are designated within treatment borders.

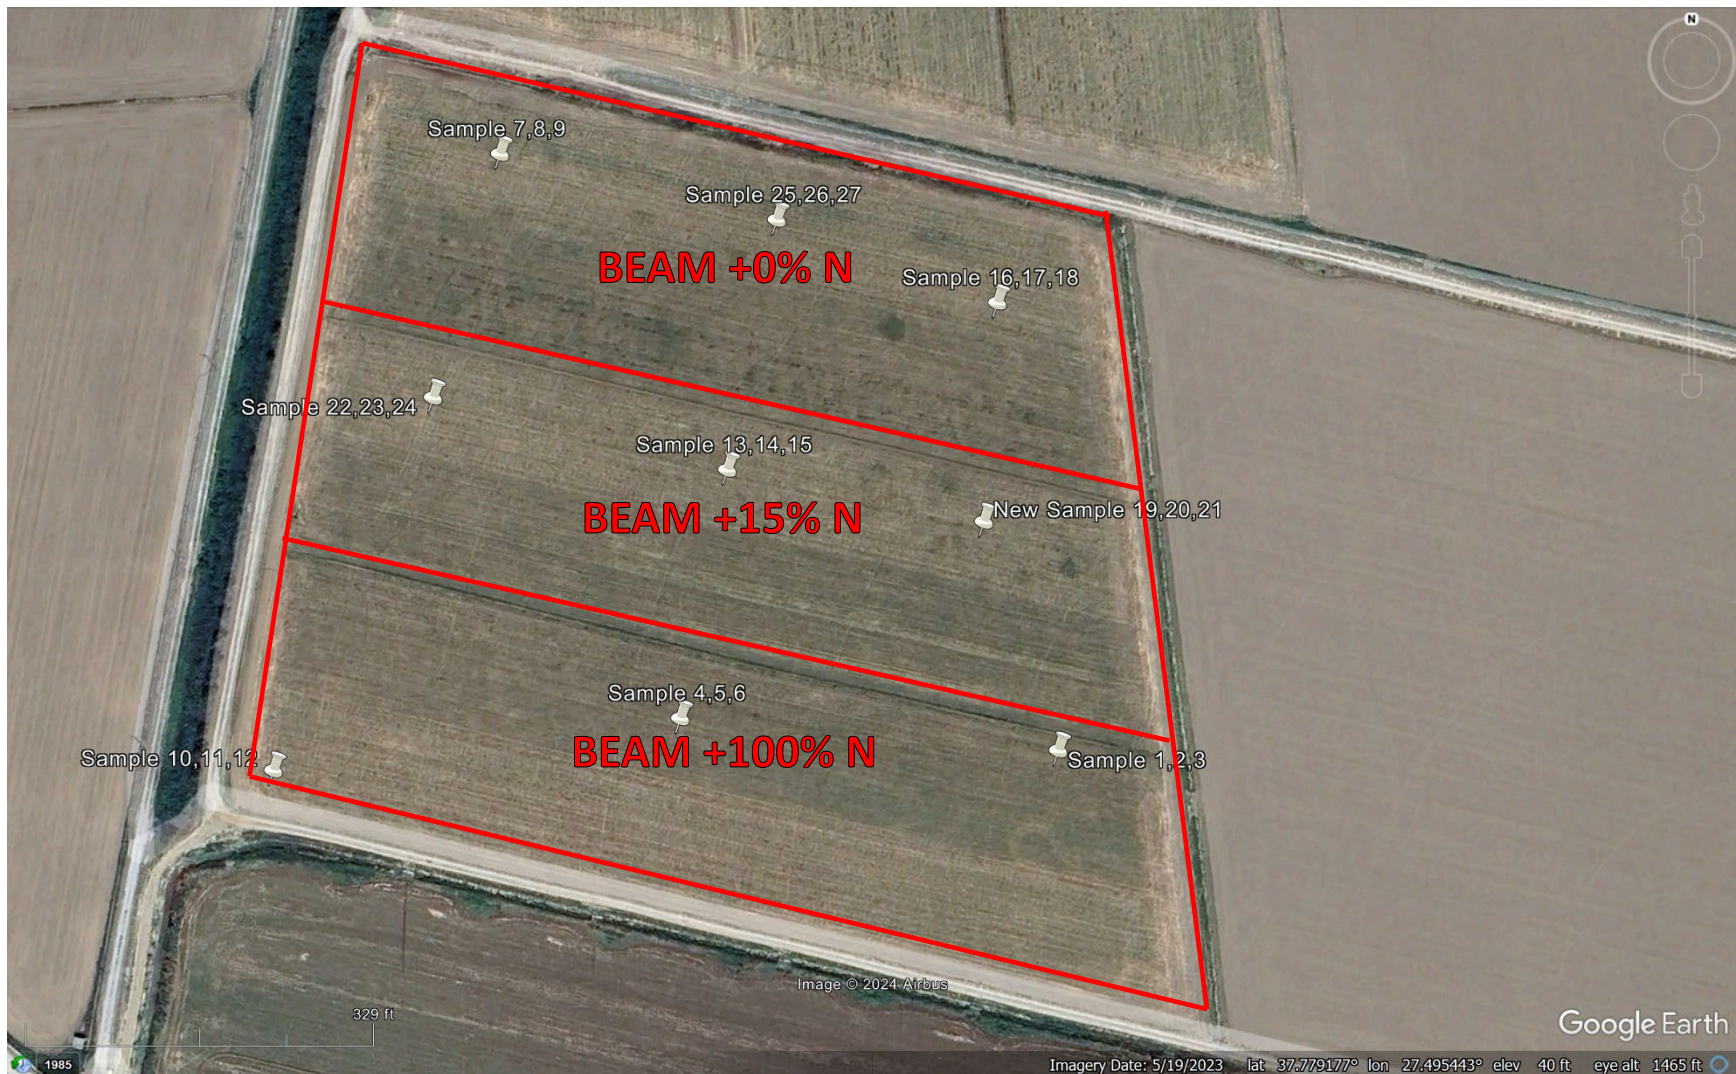

Supplement: FigureS1.pdf [file FigureS1.pdf]
