# Supplementary material for: Adoption of a biologically-enhanced agricultural management (BEAM) approach in agroecosystems for regenerating soil fertility, improving farm profitability and achieving productive utilization of atmospheric CO2
Source: PeerJ journal article supplement (doi:10.7717/peerj.19167), 2025-03-31

Figure S-2 Two-sample ANOVA statistical analysis of Soil Organic Carbon (%) comparing the three fertilizer treatments (100% N, 15% N and 0% N) administered for cotton production, to observe fertilization rate influence on 2023 soil organic carbon% at each of the three depths (0-15 cm, 15-30 cm and 30-45 cm).

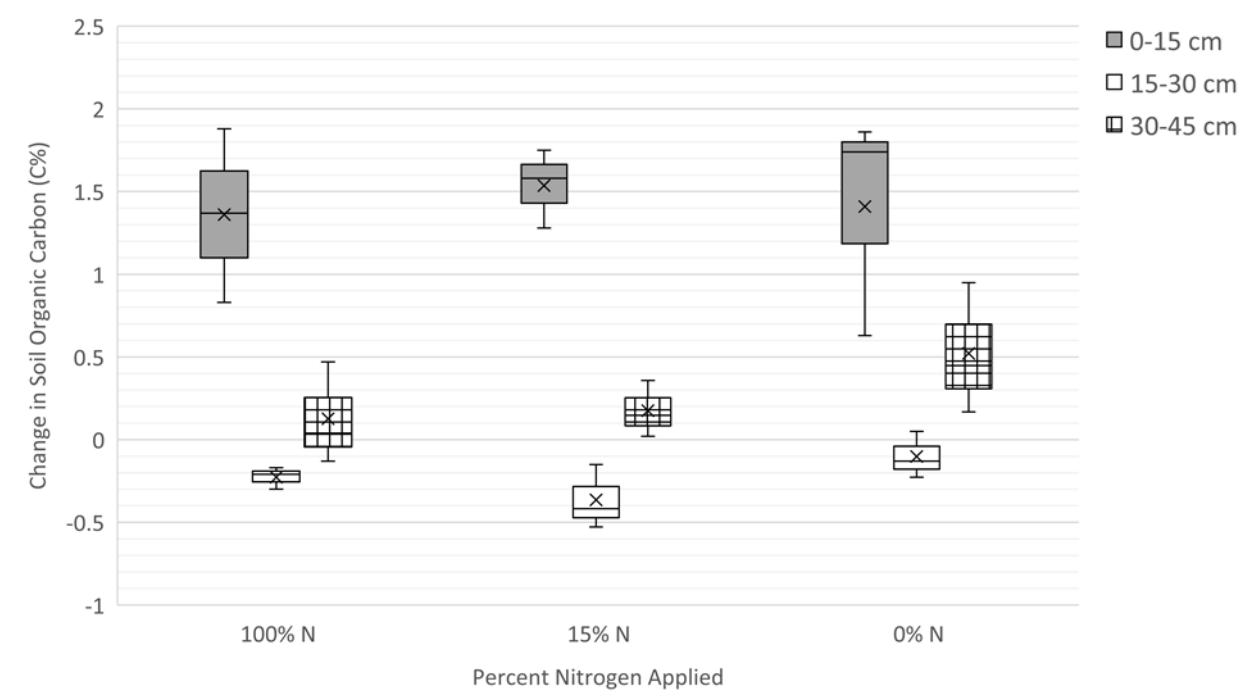

Supplement: FigureS2.pdf [file FigureS2.pdf]
